# Supplementary material for: COVID‐19 Vaccine‐Associated Cerebral Venous Thrombosis in Germany
Source: PubMed Central journal article supplement — Ann Neurol. 2021 Aug 23;90(4):627–39. doi: 10.1002/ana.26172 (PMC8427115; doi:10.1002/ana.26172), 2021-08-23
Supplement: ANA-90-627-s002.pdf [file ANA-90-627-s002.pdf]

## Variablen-Übersicht

### Fragebogen-Interne Daten

Im Datensatz finden Sie neben Ihren Fragen folgende zusätzliche Variablen, sofern Sie die entsprechende Option beim Herunterladen des Datensatzes nicht deaktivieren.

**CASE** Fortlaufende Nummer der Versuchsperson

**REF** Referenz, falls solch eine im Link zum Fragebogen übergeben wurde

**LASTPAGE** Nummer der Seite im Fragebogens, die zuletzt bearbeitet und abgeschickt wurde

**QUESTNNR** Kennung des Fragebogens, der bearbeitet wurde

**MODE** Information, ob der Fragebogen im Pretest oder durch einen Projektmitarbeiter gestartet wurde

**STARTED** Zeitpunkt, zu dem der Teilnehmer den Fragebogen aufgerufen hat

**FINISHED** Information, ob der Fragebogen bis zur letzten Seite ausgefüllt wurde

**TIME\_001...** Zeit, die ein Teilnehmer auf einer Fragebogen-Seite verbracht hat

Bitte beachten Sie, dass Sie die Fragebogen-internen Variablen nicht mit der Funktion value() auslesen können. Für Interview-Nummer und Referenz stehen aber die PHP-Funktionen [PHP-Funktion caseNumber\(\)](#) und [PHP-Funktion reference\(\)](#) zur Verfügung.

Details über die zusätzlichen Variablen stehen in der Anleitung: [Zusätzliche Variablen in der Datenausgabe](#)

### Rubrik A0: Klinik & Ansprechpartner

[A001]  Texteingabe offen

Klinik

"Bitte geben Sie die Klinik an, für die Sie melden:"

**A001\_01** Krankenhaus

**A001\_02** Klinik / Abteilung

**A001\_03** Postleitzahl der Klinik

**A001\_04**  Kontakt Email

**A001\_05** Kontakt Telefon (Mobiltelefon)

Offene Texteingabe

[A002]  Auswahl

Fragebogen

"Wurden die Angaben über die Patientin / den Patienten korrekt ausgefüllt?"

**A002** Fragebogen

1 = Ja, Datensatz verwenden

2 = Nein, Datensatz NICHT verwenden (Nur testweise ausgefüllt)

-9 = nicht beantwortet

[A003]  Texteingabe offen

Autor

"Bitte geben Sie Ihren Namen an. Dieser wird in der Publikation als Kooperationspartner\*in angegeben."

**A003\_01** Titel

**A003\_02**  Vorname

**A003\_03**  Name

**A003\_04**  Affiliation

Offene Texteingabe

[A004]  Auswahl

Autorenschaft

"Nennung als Kooperationspartner\*in in der Publikation"

**A004** Autorenschaft

1 = gewünscht

2 = nicht gewünscht.

-9 = nicht beantwortet

### Rubrik P0: Patient

[P001]  Texteingabe offen

P\_Alter

"Alter der\*des Patient\*in"

**P001\_01** Alter ... Jahre

Offene Texteingabe

|                                                                                                                        |
|------------------------------------------------------------------------------------------------------------------------|
| <p><b>[P002]</b> <input type="checkbox"/> Auswahl<br/>Geschlecht (Biologisch)<br/>"Geschlecht der*des Patient*in"</p>  |
| <p><b>P002</b> Geschlecht (Biologisch)<br/>1 = weiblich<br/>2 = männlich<br/>3 = divers<br/>-9 = nicht beantwortet</p> |

|                                                                                                                                                                                                                                                                                                                                                                                                                                                                                                                          |
|--------------------------------------------------------------------------------------------------------------------------------------------------------------------------------------------------------------------------------------------------------------------------------------------------------------------------------------------------------------------------------------------------------------------------------------------------------------------------------------------------------------------------|
| <p><b>[P003]</b> <input type="checkbox"/> Mehrfachauswahl<br/>Diagnosen<br/>"Bitte geben Sie die mutmaßlich impfbezogene Diagnose an:"</p>                                                                                                                                                                                                                                                                                                                                                                               |
| <p><b>P003</b> Diagnosen: Ausweichoption (negativ) oder Anzahl ausgewählter Optionen<br/>Ganze Zahl<br/><b>P003_01</b> Sinusthrombose<br/><b>P003_02</b> Hirnvenenthrombose<br/><b>P003_03</b> Zerebrale Ischämie<br/><b>P003_04</b> Intrakranielle Blutung<br/><b>P003_05</b> Lungenarterienembolie<br/><b>P003_06</b> Tiefe Beinvenenthrombose<br/><b>P003_07</b> Sonstiges Diagnose(n)<br/>1 = nicht gewählt<br/>2 = ausgewählt<br/><b>P003_07a</b> Sonstiges Diagnose(n) (offene Eingabe)<br/>Offene Texteingabe</p> |

|                                                                                                                                                                                                                                                                                                                                                                                         |
|-----------------------------------------------------------------------------------------------------------------------------------------------------------------------------------------------------------------------------------------------------------------------------------------------------------------------------------------------------------------------------------------|
| <p><b>[P012]</b> <input type="checkbox"/> Mehrfachauswahl<br/>DiffDiagnIKB<br/>"Differentialdiagnose der bei Aufnahme bestehenden intrakraniellen Blutung:"</p>                                                                                                                                                                                                                         |
| <p><b>P012</b> DiffDiagnIKB: Ausweichoption (negativ) oder Anzahl ausgewählter Optionen<br/>Ganze Zahl<br/><b>P012_01</b> parenchymatöse Blutung (ICB)<br/><b>P012_02</b> subdurales Hämatom (SDH)<br/><b>P012_03</b> epidurales Hämatom (EDH)<br/><b>P012_04</b> Subarachnoidalblutung (SAB)<br/><b>P012_05</b> intraventrikuläre Blutung<br/>1 = nicht gewählt<br/>2 = ausgewählt</p> |

|                                                                                                                                                                                                                                                 |
|-------------------------------------------------------------------------------------------------------------------------------------------------------------------------------------------------------------------------------------------------|
| <p><b>[P004]</b> <input type="checkbox"/> Auswahl<br/>Verwendeter Impfstoff<br/>"Welcher Impfstoff wurde der*dem Patient*in verabreicht?"</p>                                                                                                   |
| <p><b>P004</b> Verwendeter Impfstoff<br/>1 = AstraZeneca<br/>2 = BioNTech<br/>3 = Moderna<br/>4 = Johnson und Johnson<br/>5 = Sonstiger Impfstoff:<br/>-9 = nicht beantwortet<br/><b>P004_05</b> Sonstiger Impfstoff<br/>Offene Texteingabe</p> |

|                                                                                                                                      |
|--------------------------------------------------------------------------------------------------------------------------------------|
| <p><b>[P005]</b> <input type="checkbox"/> Auswahl<br/>Impfung<br/>"Impfstatus"</p>                                                   |
| <p><b>P005</b> Impfung<br/>1 = ersten Impfung gegen SARS-CoV2<br/>2 = zweiten Impfung gegen SARS-CoV2<br/>-9 = nicht beantwortet</p> |

**[P006]** Texteingabe offen  
 Impfung\_II  
 "Angaben zur Impfung"

**P006\_01**  Chargen-Nr. der ersten Impfung  
**P006\_02**  Chargen-Nr. der zweiten Impfung  
**P006\_04** Weitere Angaben (z.B. unterschiedliche Impfstoffe)  
 Offene Texteingabe  
**P006\_01a**  Chargen-Nr. der ersten Impfung: Nicht bekannt  
**P006\_02a**  Chargen-Nr. der zweiten Impfung: Nicht bekannt  
**P006\_03a**  Die Symptomatik trat ... Tage nach der letzten Impfung auf.: Nicht bekannt  
 1 = nicht gewählt  
 2 = ausgewählt  
**P006\_03**  Die Symptomatik trat ... Tage nach der letzten Impfung auf.  
 Offene Eingabe (Ganze Zahl)

**[P007]**  Texteingabe offen  
 Laobr\_I  
 "Laborparameter"

**P007\_01**  Thrombozyten bei Aufnahme ... /nl  
**P007\_02** Thrombozyten - niedrigster Wert ... /nl  
**P007\_03** D-Dimere bei Aufnahme ... µg/l  
**P007\_04** D-Dimere - höchster Wert ... µg/l  
**P007\_05** Protein C - Aktivität ... %  
**P007\_06** Protein S - Aktivität ... %  
**P007\_07** C-reaktives Protein (CRP) ... mg/l  
 Offene Texteingabe  
**P007\_01a**  Thrombozyten bei Aufnahme ... /nl: Nicht erhoben  
**P007\_02a** Thrombozyten - niedrigster Wert ... /nl: Nicht erhoben  
**P007\_03a** D-Dimere bei Aufnahme ... µg/l: Nicht erhoben  
**P007\_04a** D-Dimere - höchster Wert ... µg/l: Nicht erhoben  
**P007\_05a** Protein C - Aktivität ... %: Nicht erhoben  
**P007\_06a** Protein S - Aktivität ... %: Nicht erhoben  
**P007\_07a** C-reaktives Protein (CRP) ... mg/l: Nicht erhoben  
 1 = nicht gewählt  
 2 = ausgewählt

**[P008]**  Skala (Extrema beschriftet)  
 Labor II - AK  
 "Welche Antikörper wurden bestimmt?"

**P008\_01** Plättchenfaktor 4 Antikörper (PF4AK)  
**P008\_02** Von-Willebrand-spaltende Protease Antikörper (ADAMTS13)  
 1 = negativ  
 2 = positiv  
 -1 = nicht bestimmt  
 -2 = Ergebnisse ausstehend  
 -9 = nicht beantwortet

**[P009]** Texteingabe offen  
 Labor III -

**P009\_01** ADAMTS13 Aktivität ... %  
 Offene Eingabe (Dezimalzahl)  
**P009\_01a** ADAMTS13 Aktivität ... %: Nicht bestimmt / ausstehend  
 1 = nicht gewählt  
 2 = ausgewählt

**[P010]**  Skala (Zwischenwerte beschriftet)  
 Labor IV

**P010\_01** Faktor-V-Leiden-Mutation  
**P010\_02** Prothrombin-Mutation G20210A  
 1 = negativ  
 2 = heterozygot  
 3 = homozygot  
 -1 = nicht bestimmt  
 -2 = Ergebnis ausstehend  
 -9 = nicht beantwortet

**[P011]**  Auswahl  
**Aktuelle Modified Rankin Skala**  
 "Aktueller Zustand der Patientin / des Patienten nach der Modified Rankin Skala"

**P011 Aktuelle Modified Rankin Skala**  
 1 = 0 - Keine Symptome  
 2 = 1 - Keine relevante Beeinträchtigung. Kann trotz geringer neurologischer Defizite uneingeschränkt Alltagsaktivitäten verrichten.  
 3 = 2 - Leichte Beeinträchtigung. Kann sich ohne Hilfe versorgen, ist aber im Alltag eingeschränkt.  
 4 = 3 - Mittelschwere Beeinträchtigung. Benötigt Hilfe im Alltag, kann aber ohne fremde Hilfe bzw. mit Hilfsmitteln (Gehstock, Rollator) gehen.  
 5 = 4 - Höhergradige Beeinträchtigung. Benötigt Hilfe bei der Körperpflege, kann nicht ohne Hilfe gehen.  
 6 = 5 - Schwere Behinderung. Bettlägerig, inkontinent, benötigt ständige pflegerische Hilfe.  
 -1 = Nicht bekannt  
 -9 = nicht beantwortet

**[P013]**  Mehrfachauswahl  
**HämostaseSymptomatik**  
 "Sind bei der\*dem Patient\*in Symptome einer gestörten Hämostase aufgetreten?"

**P013 HämostaseSymptomatik: Ausweichoption (negativ) oder Anzahl ausgewählter Optionen**  
 -1 = Keine Symptome aufgetreten  
 -2 = Nicht bekannt.

**P013\_01** Petechien  
**P013\_02** Hauthämatome  
**P013\_03** Sonstige Hämatome (außer Gehirn und Hauthämatomen)  
**P013\_04** Sonstige Symptome einer gestörten Hämostase  
 1 = nicht gewählt  
 2 = ausgewählt

**P013\_04a** Sonstige Symptome einer gestörten Hämostase (offene Eingabe)  
 Offene Texteingabe

**[P014]**  Auswahl  
**HämostaseSymptomatik\_ Zeitpunkt**  
 "Wann sind die ersten Symptome einer gestörten Hämostase (Petechien, Hauthämatome oder sonstige Hämatome auss..."

**P014 HämostaseSymptomatik\_ Zeitpunkt**  
 1 = vor Beginn der neurologischen Symptomatik. Bitte geben Sie die Zeitspanne an:  
 2 = ungefähr zeitgleich (+/- 2 Stunden)  
 3 = nach Beginn der neurologischen Symptomaik. Bitte geben Sie die Zeitspanne an:  
 -1 = nicht bekannt  
 -9 = nicht beantwortet

**P014\_01** vor Beginn der neurologischen Symptomatik. Bitte geben Sie die Zeitspanne an  
**P014\_03** nach Beginn der neurologischen Symptomaik. Bitte geben Sie die Zeitspanne an  
 Offene Texteingabe

**[P015]**  Auswahl  
**COVID\_1**  
 "Die\*der Patient\*in hat folgenden SARS-CoV2-Status"

**P015 COVID\_1**  
 1 = SARS-CoV2 Infektion vor Impfung bestätigt (PCR)  
 2 = SARS-CoV2 Infektion vor Impfung (eher) ausgeschlossen (negativer Antikörpertest vor Impfung)  
 3 = Keine SARS-CoV2 Infektion bekannt (kein positives Testergebnis (PCR, Antikörpertest vor Impfung))  
 4 = SARS-CoV2-Infektionsstatus unbekannt  
 5 = Komplexer Status (z.B. Infektion nach Impfung):  
 -9 = nicht beantwortet

**P015\_05** Komplexer Status (z.B. Infektion nach Impfung)  
 Offene Texteingabe

**[P016]**  Auswahl  
**COVID\_2 Verlauf**  
 "Wie war der Verlauf der SARS-CoV2-Infektion?"

**P016 COVID\_2 Verlauf**  
 1 = Symptomloser Verlauf  
 2 = Milde Symptome (keine oder ambulante ärztliche Versorgung)  
 3 = Stationäre Behandlung erforderlich  
 4 = Behandlung auf Intensivstation erforderlich  
 5 = Noninvasive Beatmung erforderlich  
 6 = Invasive Beatmung erforderlich  
 7 = ECMO erforderlich  
 -1 = nicht bekannt  
 -9 = nicht beantwortet

|                                                                                                                                                                                                                                                                                                                                                                                                                                                                                                                                                                                                            |
|------------------------------------------------------------------------------------------------------------------------------------------------------------------------------------------------------------------------------------------------------------------------------------------------------------------------------------------------------------------------------------------------------------------------------------------------------------------------------------------------------------------------------------------------------------------------------------------------------------|
| <p><b>[P017]</b> <input type="checkbox"/> Auswahl<br/> <b>COVID_3 Zeitpunkt</b><br/>         "Zeitpunkt der SARS-CoV2-Infektion"</p>                                                                                                                                                                                                                                                                                                                                                                                                                                                                       |
| <p><b>P017 COVID_3 Zeitpunkt</b><br/>         1 = Mindestens 14 Tage vor der 1. Impfung<br/>         2 = Mindestens 1 Monat vor der 1. Impfung<br/>         3 = Mindestens 3 Monate vor der 1. Impfung<br/>         4 = Mindestens 6 Monate vor der 1. Impfung<br/>         5 = Nachweis erfolgte nach der 1. und vor der 2. Impfung:<br/>         6 = Nachweis erfolgte nach der 2. Impfung:<br/>         -9 = nicht beantwortet</p> <p><b>P017_05</b> Nachweis erfolgte nach der 1. und vor der 2. Impfung<br/> <b>P017_06</b> Nachweis erfolgte nach der 2. Impfung<br/>         Offene Texteingabe</p> |

## Rubrik T0: Therapie

|                                                                                                                                                                                                                                                                                                                                                                                            |
|--------------------------------------------------------------------------------------------------------------------------------------------------------------------------------------------------------------------------------------------------------------------------------------------------------------------------------------------------------------------------------------------|
| <p><b>[T001]</b> <input type="checkbox"/> Mehrfachauswahl<br/> <b>Immunotherapie</b><br/>         "Welche immunologische Therapie wurde aufgrund des akuten Krankheitsbildes eingeleitet?"</p>                                                                                                                                                                                             |
| <p><b>T001 Immunotherapie: Ausweichoption (negativ) oder Anzahl ausgewählter Optionen</b><br/>         -1 = Keine</p> <p><b>T001_01</b> Plasmapherese<br/> <b>T001_02</b> IVIG<br/> <b>T001_03</b> Kortikoide<br/> <b>T001_04</b> Sonstige<br/>         1 = nicht gewählt<br/>         2 = ausgewählt</p> <p><b>T001_04a</b> Sonstige (offene Eingabe)<br/>         Offene Texteingabe</p> |

|                                                                                                                                                                                                                                                                                                                                                                                                                                                                                                                                                                                                    |
|----------------------------------------------------------------------------------------------------------------------------------------------------------------------------------------------------------------------------------------------------------------------------------------------------------------------------------------------------------------------------------------------------------------------------------------------------------------------------------------------------------------------------------------------------------------------------------------------------|
| <p><b>[T002]</b> <input type="checkbox"/> Mehrfachauswahl<br/> <b>Antikoagulation</b><br/>         "Welche Form der therapeutischen Antikoagulation wurde aufgrund des akuten Krankheitsbildes eingeleitet?"</p>                                                                                                                                                                                                                                                                                                                                                                                   |
| <p><b>T002 Antikoagulation: Ausweichoption (negativ) oder Anzahl ausgewählter Optionen</b><br/>         -1 = Keine Antikoagulation durchgeführt</p> <p><b>T002_01</b> Heparin s.c.<br/> <b>T002_02</b> Heparin i.v.<br/> <b>T002_03</b> Fraxiparin s.c.<br/> <b>T002_04</b> Argatroban (Argatra®)<br/> <b>T002_05</b> Vitamin-K-Antagonist (z.B. Marcumar)<br/> <b>T002_06</b> Direkte orale Antikoagulanzen (DOAK)<br/> <b>T002_07</b> Sonstiges<br/>         1 = nicht gewählt<br/>         2 = ausgewählt</p> <p><b>T002_07a</b> Sonstiges (offene Eingabe)<br/>         Offene Texteingabe</p> |

|                                                                                                                                                                                                                                                                                                                                                                                                                                                                   |
|-------------------------------------------------------------------------------------------------------------------------------------------------------------------------------------------------------------------------------------------------------------------------------------------------------------------------------------------------------------------------------------------------------------------------------------------------------------------|
| <p><b>[T003]</b> <input type="checkbox"/> Mehrfachauswahl<br/> <b>Intervention</b><br/>         "Welche Intervention wurde aufgrund des akuten Krankheitsbildes eingeleitet?"</p>                                                                                                                                                                                                                                                                                 |
| <p><b>T003 Intervention: Ausweichoption (negativ) oder Anzahl ausgewählter Optionen</b><br/>         -1 = Keine erforderlich</p> <p><b>T003_01</b> Thrombektomie<br/> <b>T003_02</b> Hemikraniektomie<br/> <b>T003_03</b> mechanische Rekanalisation<br/> <b>T003_04</b> lokale Lyse<br/> <b>T003_05</b> Sonstige<br/>         1 = nicht gewählt<br/>         2 = ausgewählt</p> <p><b>T003_05a</b> Sonstige (offene Eingabe)<br/>         Offene Texteingabe</p> |

## Rubrik O0: Outcome

|                                                                                                                                                                                                                                                                                                                |
|----------------------------------------------------------------------------------------------------------------------------------------------------------------------------------------------------------------------------------------------------------------------------------------------------------------|
| <p><b>[O001]</b> <input type="checkbox"/> Auswahl<br/> <b>Outcome</b><br/>         "Bitte geben Sie das Ergebnis der Behandlung an:"</p>                                                                                                                                                                       |
| <p><b>O001 Outcome</b><br/>         1 = Entlassen<br/>         2 = In eine nachsorgende Klinik / Rehasentrum<br/>         3 = In eine andere Akutklinik / Schwerpunktzentrum<br/>         4 = Verstorben<br/>         5 = Aktuell noch in unserer Klinik in Behandlung<br/>         -9 = nicht beantwortet</p> |

|                                                                                                                                                                                                                                                                |
|----------------------------------------------------------------------------------------------------------------------------------------------------------------------------------------------------------------------------------------------------------------|
| <p><b>[O002]</b> <input type="checkbox"/> Auswahl<br/> <b>Aktuelle Behandlung</b><br/>         "Wo wird die / der Patient*in aktuell behandelt?"</p>                                                                                                           |
| <p><b>O002 Aktuelle Behandlung</b><br/>         1 = Normalstation<br/>         2 = Intermediate Care Station / Stroke Unit<br/>         3 = Intensivstation (nicht beatmet)<br/>         4 = Intensivstation (beatmet)<br/>         -9 = nicht beantwortet</p> |

|                                                                                                                                                                                                                                                                                                                                                                                                                                                                                                                                                                                                                                                                                                                                                                                                                  |
|------------------------------------------------------------------------------------------------------------------------------------------------------------------------------------------------------------------------------------------------------------------------------------------------------------------------------------------------------------------------------------------------------------------------------------------------------------------------------------------------------------------------------------------------------------------------------------------------------------------------------------------------------------------------------------------------------------------------------------------------------------------------------------------------------------------|
| <p><b>[O003]</b> <input type="checkbox"/> Auswahl<br/> <b>Modified Rankin Skala</b><br/>         "Zustand der Patietin / des Patienten nach der Modified Rankin Skala zum Zeitpunkt der Entlassung / Verlegung"</p>                                                                                                                                                                                                                                                                                                                                                                                                                                                                                                                                                                                              |
| <p><b>O003 Modified Rankin Skala</b><br/>         1 = 0 - Keine Symptome<br/>         2 = 1 - Keine relevante Beeinträchtigung. Kann trotz geringer neurologischer Defizite uneingeschränkt Alltagsaktivitäten verrichten.<br/>         3 = 2 - Leichte Beeinträchtigung. Kann sich ohne Hilfe versorgen, ist aber im Alltag eingeschränkt.<br/>         4 = 3 - Mittelschwere Beeinträchtigung. Benötigt Hilfe im Alltag, kann aber ohne fremde Hilfe bzw. mit Hilfsmitteln (Gehstock, Rollator) gehen.<br/>         5 = 4 - Höhergradige Beeinträchtigung. Benötigt Hilfe bei der Körperpflege, kann nicht ohne Hilfe gehen.<br/>         6 = 5 - Schwere Behinderung. Bettlägerig, inkontinent, benötigt ständige pflegerische Hilfe.<br/>         -1 = Nicht bekannt<br/>         -9 = nicht beantwortet</p> |

|                                                                                                                                                           |
|-----------------------------------------------------------------------------------------------------------------------------------------------------------|
| <p><b>[O004]</b> <input type="checkbox"/> Auswahl<br/> <b>Obduktion</b><br/>         "Wurde die/der Patient*in obduziert?"</p>                            |
| <p><b>O004 Obduktion</b><br/>         1 = ja<br/>         2 = nein<br/>         -1 = Entscheidung noch ausstehend<br/>         -9 = nicht beantwortet</p> |

## Rubrik V0: Behandlungsverlauf

|                                                                                                                                                                                                                                                                                                                                                                                                                                                                                                                                                                                                                                                                                                                                                          |
|----------------------------------------------------------------------------------------------------------------------------------------------------------------------------------------------------------------------------------------------------------------------------------------------------------------------------------------------------------------------------------------------------------------------------------------------------------------------------------------------------------------------------------------------------------------------------------------------------------------------------------------------------------------------------------------------------------------------------------------------------------|
| <p><b>[V001]</b> <input type="checkbox"/> Mehrfachauswahl<br/> <b>Ereignisse</b><br/>         "Unverwünschte Ereignisse und Komplikationen im Behandlungsverlauf:"</p>                                                                                                                                                                                                                                                                                                                                                                                                                                                                                                                                                                                   |
| <p><b>V001 Ereignisse: Ausweichoption (negativ) oder Anzahl ausgewählter Optionen</b><br/>         -1 = Keine besonderen Ereignisse<br/>         -2 = Nicht bekannt</p> <p><b>V001_01</b> Zerebrale Ischämie<br/> <b>V001_02</b> Intrakranielle Blutung<br/> <b>V001_04</b> Sonstiges unerwünschtes Ereignis 1<br/> <b>V001_05</b> Sonstiges unerwünschtes Ereignis 2<br/> <b>V001_06</b> Sonstiges unerwünschtes Ereignis 3<br/>         1 = nicht gewählt<br/>         2 = ausgewählt</p> <p><b>V001_04a</b> Sonstiges unerwünschtes Ereignis 1 (offene Eingabe)<br/> <b>V001_05a</b> Sonstiges unerwünschtes Ereignis 2 (offene Eingabe)<br/> <b>V001_06a</b> Sonstiges unerwünschtes Ereignis 3 (offene Eingabe)<br/>         Offene Texteingabe</p> |

|                                                                                                                                                                                                                                                                                                                                                                                                         |
|---------------------------------------------------------------------------------------------------------------------------------------------------------------------------------------------------------------------------------------------------------------------------------------------------------------------------------------------------------------------------------------------------------|
| <p><b>[V002]</b> <input type="checkbox"/> Mehrfachauswahl<br/> DiffDiagnIKB_Verlauf<br/> "Differentialdiagnose der im Behandlungsverlauf aufgetretenen intrakraniellen Blutung"</p>                                                                                                                                                                                                                     |
| <p><b>V002</b> DiffDiagnIKB_Verlauf: Ausweichoption (negativ) oder Anzahl ausgewählter Optionen<br/> Ganze Zahl<br/> <b>V002_01</b> parenchymatöse Blutung (ICB)<br/> <b>V002_02</b> subdurales Hämatom (SDH)<br/> <b>V002_03</b> epidurales Hämatom (EDH)<br/> <b>V002_04</b> Subarachnoidalblutung (SAB)<br/> <b>V002_05</b> intraventrikuläre Blutung<br/> 1 = nicht gewählt<br/> 2 = ausgewählt</p> |

## Rubrik R0: Risikofaktoren

|                                                                                                                                                                                                                                                                                                                                                                                                                                                                                                                                                                                                                                                                                                                                                                                                                                                                                                                                                          |
|----------------------------------------------------------------------------------------------------------------------------------------------------------------------------------------------------------------------------------------------------------------------------------------------------------------------------------------------------------------------------------------------------------------------------------------------------------------------------------------------------------------------------------------------------------------------------------------------------------------------------------------------------------------------------------------------------------------------------------------------------------------------------------------------------------------------------------------------------------------------------------------------------------------------------------------------------------|
| <p><b>[R001]</b> <input type="checkbox"/> Mehrfachauswahl<br/> Vorerkrankungen<br/> "Welche Vorerkrankungen hat die / der Patient*in?"</p>                                                                                                                                                                                                                                                                                                                                                                                                                                                                                                                                                                                                                                                                                                                                                                                                               |
| <p><b>R001</b> Vorerkrankungen: Ausweichoption (negativ) oder Anzahl ausgewählter Optionen<br/> -1 = Keine bekannten Vorerkrankungen<br/> <b>R001_01</b> KHK<br/> <b>R001_02</b> Adipositas (BMI &gt; 30)<br/> <b>R001_03</b> Diabetes mellitus<br/> <b>R001_04</b> Bekannte Gerinnungstörung<br/> <b>R001_05</b> Vorhergehende Thrombose(n)<br/> <b>R001_06</b> Polycythaemia vera<br/> <b>R001_07</b> Sichelzellanaemie<br/> <b>R001_08</b> Malignom<br/> <b>R001_09</b> Vaskulitis<br/> <b>R001_10</b> Infektionen im Gesichtsbereich<br/> <b>R001_11</b> Sonstige Vorerkrankung 1<br/> <b>R001_12</b> Sonstige Vorerkrankung 2<br/> 1 = nicht gewählt<br/> 2 = ausgewählt<br/> <b>R001_04a</b> Bekannte Gerinnungstörung (offene Eingabe)<br/> <b>R001_09a</b> Vaskulitis (offene Eingabe)<br/> <b>R001_11a</b> Sonstige Vorerkrankung 1 (offene Eingabe)<br/> <b>R001_12a</b> Sonstige Vorerkrankung 2 (offene Eingabe)<br/> Offene Texteingabe</p> |

|                                                                                                                                                                                                                                                                                                                                                                                                                                   |
|-----------------------------------------------------------------------------------------------------------------------------------------------------------------------------------------------------------------------------------------------------------------------------------------------------------------------------------------------------------------------------------------------------------------------------------|
| <p><b>[R002]</b> <input type="checkbox"/> Auswahl<br/> Medikation<br/> "Welche Vormedikation nahm die*der Patient*in ein?"</p>                                                                                                                                                                                                                                                                                                    |
| <p><b>R002</b> Medikation<br/> 1 = Ovulationshemmer<br/> 2 = Thrombozytenaggregationshemmer<br/> 3 = Antikoagulans<br/> 4 = Östrogene<br/> 5 = Chemotherapeutika<br/> 6 = Kortikoide<br/> 7 = Erythropoetin<br/> 8 = Vitamin A<br/> 9 = Asparaginase<br/> 10 = Sonstige:<br/> -1 = Keine Vormedikation<br/> -2 = Vormedikation nicht bekannt<br/> -9 = nicht beantwortet<br/> <b>R002_10</b> Sonstige<br/> Offene Texteingabe</p> |

|                                                                                                                             |
|-----------------------------------------------------------------------------------------------------------------------------|
| <p><b>[R003]</b> <input type="checkbox"/> Auswahl<br/> Nikotin<br/> "Nikotinkonsum"</p>                                     |
| <p><b>R003</b> Nikotin<br/> 1 = Raucher*in<br/> 2 = Nichtraucher*in<br/> -1 = nicht bekannt<br/> -9 = nicht beantwortet</p> |

**Rubrik S0: Sonstiges****[S001]** Texteingabe offen

Sonstiges

"Weitere relevante Informationen"

**S001\_01** Weitere Informationen

Offene Texteingabe

**[S002]**  Mehrfachauswahl

Consent

**S002** Consent: Ausweichoption (negativ) oder Anzahl ausgewählter Optionen

Ganze Zahl

**S002\_01** Ich habe die Datenschutzbestimmungen zur Kenntnis genommen und stimme einer

Verarbeitung meiner Emailadresse und meines Namens für die oben genannten Zwecke zu.

1 = nicht gewählt

2 = ausgewählt

**[S005]**  Auswahl

PEI-Meldung

"Ist eine Meldung über das zuständige Gesundheitsamt an das Paul Ehrlich Institut (PEI) erfolgt?"

**S005** PEI-Meldung

1 = ja

2 = nein

-1 = Nicht bekannt

-9 = nicht beantwortet

**[S008]**  Auswahl

Freimeldung

"Sie melden ..."

**S008** Freimeldung

1 = ... einen in Ihrer Klinik stationär behandelten Fall einer unerwünschten Impfreaktion.

2 = ... , dass in Ihrer Klinik KEIN Verdachtsfall einer unerwünschten Impfreaktion bekannt geworden ist.

-9 = nicht beantwortet
